# Supplementary material for: A High Proportion of Malaria Vector Biting and Resting Indoors despite Extensive LLIN Coverage in Côte d’Ivoire
Source: MDPI journal article supplement (doi:10.3390/insects14090758), 2023-09-12
Supplement: s1 [file s1]

## SM Supplementary Material

**Table S1:** Number of sampled houses with PSC and WT in the two villages during each months of collections

| Village | Sampling Methods | Months of collections |       |     |         |
|---------|------------------|-----------------------|-------|-----|---------|
|         |                  | December              | March | May | October |
| Coastal | WT               | 20                    | 20    | 20  | 20      |
|         | PSC              | 11                    | 11    | 11  | 15      |
| Inland  | WT               | 20                    | 20    | 20  | 20      |
|         | PSC              | 20                    | 20    | 20  | 18      |

**Table S2:** Summary of female *Anopheles* mosquitoes collected from PSC and WT in coastal and inland villages in Côte d'Ivoire

| Study sites and <i>Anopheles</i> | PSC | WT  |
|----------------------------------|-----|-----|
| Coastal                          |     |     |
| <i>An. gambiae</i> s.l.          | 151 | 118 |
| <i>An. nili</i>                  | 1   | 3   |
| <i>An. coustani</i>              | 1   | 0   |
| <i>An. salbaii</i>               | 1   | 0   |
| <i>An. funestus</i>              | 0   | 0   |
| Inland                           |     |     |
| <i>An. gambiae</i> s.l.          | 162 | 146 |
| <i>An. nili</i>                  | 0   | 0   |
| <i>An. salbaii</i>               | 0   | 0   |
| <i>An. coustani</i>              | 0   | 0   |
| <i>An. funestus</i>              | 43  | 17  |

**Table S3:** Result of LM-1 of *An. gambiae* s.l. female m/p/n in the coastal and inland village in with PSC and WT sampling methods. Inland village and WT sampling method collections taken as reference level.

| Variables   | Estimates | Std. Error | t-values | Pr (> t ) |
|-------------|-----------|------------|----------|-----------|
| Intercept   | 0,503     | 0,241      | 2,081    | 0,036*    |
| PSC         | 0,578     | 0,334      | 1,679    | 0,094     |
| Coastal     | 0,263     | 0,342      | 0,770    | 0,442     |
| PSC*Coastal | -0,098    | 0,523      | -0,188   | 0,851     |

**Table S4:** Result of GLM-2 of *An. gambiae* s.l. female Plasmodium infection rate in the coastal and inland village in with PSC and WT sampling methods. Inland village and WT sampling method collections taken as reference level.

| Variables   | Estimates | Std. Error | t-values | Pr (> t )   |
|-------------|-----------|------------|----------|-------------|
| Intercept   | -2,951    | 0,387      | -7,614   | 2,66E-14*** |
| PSC         | 2,335     | 0,442      | 5,28     | 1,29E-07*** |
| Coastal     | 0,025     | 0,57       | 0,044    | 0,965       |
| PSC*Coastal | -0,78     | 0,663      | -1,176   | 0,241       |

**Table S5:** Blood meal origins of *An. gambiae* s.l. collected by PSC and WT in Coastal and Inland villages in Cote D'Ivoire.

| Village | Blood-meal origins | PSC        | WT        |
|---------|--------------------|------------|-----------|
| Coastal | Number tested      | 42         | 8         |
|         | Human              | 97,6% (41) | 87,5% (7) |
|         | Bovine/Goat        | 0          | 12,5 %(1) |
|         | Human+Dog          | 2,4 (1)    | 0         |
|         | HBI                | 100%       | 87,50%    |
| Inland  | Number tested      | 39         | 2         |
|         | Human              | 100% (39)  | 100% (2)  |
|         | Bovine/Goat        | 0          | 0         |
|         | Human+Dog          | 0          | 0         |
|         | HBI                | 100%       | 100%      |

**Table S6:** Result of GLMM-3 of blood-fed/ empty *An. gambiae* s.l. female coastal and inland village with PSC and WT sampling methods. WT sampling method collections taken as reference level.

| Village | Variables | Estimates | Std. Error | t-values | Pr (> t ) |
|---------|-----------|-----------|------------|----------|-----------|
| Coastal | Intercept | -1.140    | 0.583      | -1.953   | 0.051     |
|         | PSC       | 3.073     | 0.849      | 3.620    | 0.0002    |
| Inland  | Intercept | -2.851    | 0.617      | -4.616   | 3.90e-06  |
|         | PSC       | 3.774     | 0.788      | 4.789    | 1.67e-06  |

**Table S7:** Observed mean proportion of people sleeping under LLIN aggregate for month of collections in each sampling house and number of *An. gambiae* collected blood fed and empty in the coastal and inland village.

| Village | House Number | Month    | Mean people sleeping under LLIN (%) | Number of people sleeping in the house | Number of people sleeping in the house under LLINs | Number of <i>An. gambiae</i> blood fed | Number of <i>An. gambiae</i> empty |
|---------|--------------|----------|-------------------------------------|----------------------------------------|----------------------------------------------------|----------------------------------------|------------------------------------|
| Coastal | 1            | December | 100                                 | 4                                      | 4                                                  | 0                                      | 0                                  |
|         |              | March    | 100                                 | 4                                      | 4                                                  | 0                                      | 0                                  |
|         |              | May      | 100                                 | 4                                      | 4                                                  | 1                                      | 9                                  |
|         |              | October  | 100                                 | 12                                     | 12                                                 | 0                                      | 0                                  |
|         | 2            | December | 100                                 | 8                                      | 8                                                  | 0                                      | 0                                  |
|         |              | March    | 100                                 | 8                                      | 8                                                  | 0                                      | 0                                  |
|         |              | May      | 40                                  | 5                                      | 2                                                  | 1                                      | 0                                  |
|         |              | October  | 0                                   | 12                                     | 0                                                  | 0                                      | 0                                  |
|         | 3            | December | 100                                 | 8                                      | 8                                                  | 0                                      | 0                                  |
|         |              | March    | 100                                 | 8                                      | 8                                                  | 0                                      | 0                                  |
|         |              | May      | 100                                 | 8                                      | 8                                                  | 8                                      | 32                                 |
|         |              | October  | 100                                 | 8                                      | 8                                                  | 0                                      | 0                                  |
|         | 4            | December | 0                                   | 12                                     | 0                                                  | 3                                      | 8                                  |
|         |              | March    | 0                                   | 12                                     | 0                                                  | 0                                      | 0                                  |
|         |              | May      | 50                                  | 12                                     | 6                                                  | 22                                     | 14                                 |
|         |              | October  | 0                                   | 4                                      | 0                                                  | 0                                      | 0                                  |
|         | 5            | December | 100                                 | 4                                      | 4                                                  | 1                                      | 8                                  |
|         |              | March    | 100                                 | 4                                      | 4                                                  | 0                                      | 2                                  |
|         |              | May      | 100                                 | 10                                     | 10                                                 | 5                                      | 4                                  |
|         |              | October  | 100                                 | 4                                      | 4                                                  | 0                                      | 0                                  |
|         | 6            | December | 100                                 | 2                                      | 2                                                  | 1                                      | 0                                  |
|         |              | May      | 0                                   | 1                                      | 0                                                  | 3                                      | 1                                  |
|         |              | October  | 0                                   | 3                                      | 0                                                  | 0                                      | 0                                  |
|         | 7            | December | 50                                  | 2                                      | 1                                                  | 0                                      | 0                                  |
|         | 8            | December | 100                                 | 2                                      | 2                                                  | 0                                      | 0                                  |
|         | 9            | December | 100                                 | 1                                      | 1                                                  | 3                                      | 0                                  |
|         | 10           | December | 0                                   | 2                                      | 0                                                  | 2                                      | 0                                  |
|         | 11           | December | 0                                   | 4                                      | 0                                                  | 0                                      | 0                                  |
|         | 12           | December | 0                                   | 1                                      | 0                                                  | 3                                      | 0                                  |
|         | 13           | December | 0                                   | 3                                      | 0                                                  | 0                                      | 0                                  |
|         |              | May      | 100                                 | 1                                      | 1                                                  | 2                                      | 0                                  |
|         |              | October  | 100                                 | 1                                      | 1                                                  | 0                                      | 0                                  |
|         | 14           | December | 100                                 | 3                                      | 3                                                  | 0                                      | 1                                  |
|         |              | May      | 0                                   | 4                                      | 0                                                  | 12                                     | 2                                  |
|         |              | October  | 100                                 | 1                                      | 1                                                  | 1                                      | 0                                  |
|         | 15           | December | 100                                 | 3                                      | 3                                                  | 8                                      | 1                                  |
|         |              | May      | 100                                 | 4                                      | 4                                                  | 0                                      | 0                                  |
|         | 16           | December | 0                                   | 2                                      | 0                                                  | 0                                      | 0                                  |
|         | 17           | March    | 100                                 | 2                                      | 2                                                  | 0                                      | 0                                  |
|         |              | May      | 100                                 | 1                                      | 1                                                  | 1                                      | 2                                  |

|        |    |          |     |    |    |    |    |
|--------|----|----------|-----|----|----|----|----|
|        | 18 | March    | 0   | 1  | 0  | 2  | 0  |
|        | 19 | March    | 66  | 3  | 2  | 4  | 0  |
|        | 20 | March    | 100 | 2  | 2  | 0  | 0  |
|        |    | March    | 66  | 3  | 2  | 3  | 0  |
|        | 21 | May      | 100 | 4  | 4  | 0  | 0  |
|        |    | October  | 100 | 2  | 2  | 0  | 0  |
|        | 22 | March    | 100 | 2  | 2  | 1  | 3  |
|        | 23 | March    | 100 | 2  | 2  | 0  | 0  |
|        | 24 | March    | 100 | 2  | 2  | 6  | 0  |
|        | 25 | March    | 0   | 4  | 0  | 6  | 4  |
|        | 26 | March    | 0   | 4  | 0  | 21 | 3  |
|        | 27 | March    | 50  | 4  | 2  | 9  | 0  |
|        |    | May      | 33  | 6  | 2  | 6  | 10 |
|        | 28 | October  | 20  | 10 | 2  | 5  | 1  |
|        |    | May      | 100 | 3  | 3  | 4  | 1  |
|        | 29 | October  | 100 | 1  | 1  | 0  | 0  |
|        | 30 | May      | 100 | 1  | 1  | 0  | 0  |
|        | 31 | May      | 0   | 3  | 0  | 0  | 0  |
|        | 32 | May      | 100 | 2  | 2  | 5  | 7  |
|        | 33 | October  | 100 | 3  | 3  | 0  | 1  |
|        | 34 | October  | 100 | 1  | 1  | 1  | 0  |
|        | 35 | October  | 100 | 1  | 1  | 0  | 0  |
|        | 36 | October  | 100 | 2  | 2  | 0  | 0  |
|        | 37 | October  | 100 | 1  | 1  | 0  | 0  |
|        | 38 | October  | 100 | 1  | 1  | 0  | 0  |
|        | 39 | October  | 100 | 2  | 2  | 2  | 0  |
|        | 40 | October  | 100 | 1  | 1  | 0  | 0  |
| inland |    | December | 100 | 16 | 16 | 1  | 2  |
|        |    | March    | 100 | 16 | 16 | 0  | 0  |
|        | 1  | May      | 100 | 16 | 16 | 1  | 0  |
|        |    | October  | 100 | 16 | 16 | 1  | 39 |
|        |    | December | 100 | 12 | 12 | 0  | 0  |
|        |    | March    | 100 | 12 | 12 | 0  | 0  |
|        | 2  | May      | 100 | 12 | 12 | 0  | 0  |
|        |    | October  | 100 | 12 | 12 | 0  | 0  |
|        |    | December | 100 | 16 | 16 | 0  | 0  |
|        |    | March    | 100 | 16 | 16 | 0  | 0  |
|        | 3  | May      | 100 | 16 | 16 | 0  | 0  |
|        |    | October  | 100 | 16 | 16 | 0  | 14 |
|        |    | December | 100 | 28 | 28 | 0  | 0  |
|        |    | March    | 100 | 4  | 4  | 0  | 1  |
|        | 4  | May      | 100 | 4  | 4  | 1  | 0  |
|        |    | October  | 100 | 4  | 4  | 3  | 10 |
|        |    | December | 100 | 16 | 16 | 0  | 0  |
|        |    | March    | 100 | 16 | 16 | 0  | 0  |
|        | 5  | May      | 100 | 28 | 28 | 2  | 3  |
|        |    | October  | 100 | 28 | 28 | 0  | 63 |

|    |          |     |   |   |    |   |
|----|----------|-----|---|---|----|---|
| 6  | December | 100 | 2 | 2 | 2  | 0 |
|    | March    | 100 | 2 | 2 | 0  | 0 |
|    | May      | 100 | 2 | 2 | 0  | 0 |
|    | October  | 100 | 2 | 2 | 0  | 0 |
| 7  | December | 100 | 1 | 1 | 0  | 0 |
|    | March    | 0   | 3 | 0 | 0  | 0 |
|    | May      | 0   | 3 | 0 | 0  | 0 |
|    | October  | 0   | 3 | 0 | 8  | 0 |
| 8  | December | 100 | 2 | 2 | 2  | 1 |
|    | March    | 0   | 1 | 0 | 0  | 0 |
|    | May      | 0   | 1 | 0 | 0  | 0 |
|    | October  | 0   | 1 | 0 | 27 | 0 |
| 9  | December | 0   | 1 | 0 | 0  | 0 |
|    | March    | 100 | 1 | 1 | 0  | 0 |
|    | May      | 100 | 1 | 1 | 0  | 1 |
|    | October  | 100 | 1 | 1 | 3  | 1 |
| 10 | December | 0   | 3 | 0 | 0  | 0 |
|    | March    | 100 | 2 | 2 | 0  | 0 |
|    | May      | 100 | 2 | 2 | 0  | 0 |
|    | October  | 100 | 2 | 2 | 0  | 0 |
| 11 | December | 100 | 4 | 4 | 0  | 1 |
|    | March    | 100 | 4 | 4 | 0  | 0 |
|    | May      | 100 | 4 | 4 | 0  | 0 |
|    | October  | 100 | 4 | 4 | 1  | 0 |
| 12 | December | 0   | 6 | 0 | 4  | 1 |
|    | March    | 0   | 6 | 0 | 0  | 0 |
|    | May      | 0   | 6 | 0 | 0  | 1 |
|    | October  | 0   | 6 | 0 | 1  | 0 |
| 13 | December | 0   | 4 | 0 | 1  | 4 |
|    | March    | 0   | 4 | 0 | 0  | 0 |
|    | May      | 0   | 4 | 0 | 0  | 0 |
|    | October  | 0   | 4 | 0 | 1  | 0 |
| 14 | December | 100 | 5 | 5 | 0  | 0 |
|    | March    | 100 | 5 | 5 | 0  | 0 |
|    | May      | 100 | 5 | 5 | 1  | 0 |
|    | October  | 100 | 5 | 5 | 0  | 4 |
| 15 | December | 100 | 4 | 4 | 0  | 0 |
|    | March    | 100 | 4 | 4 | 1  | 0 |
|    | May      | 100 | 4 | 4 | 1  | 1 |
|    | October  | 100 | 4 | 4 | 1  | 0 |
| 16 | December | 100 | 2 | 2 | 2  | 5 |
|    | March    | 100 | 2 | 2 | 0  | 0 |
|    | May      | 100 | 2 | 2 | 2  | 0 |
|    | October  | 100 | 2 | 2 | 4  | 0 |
| 17 | December | 100 | 2 | 2 | 0  | 2 |
|    | March    | 100 | 2 | 2 | 0  | 0 |
|    | May      | 100 | 2 | 2 | 1  | 0 |
|    | October  | 100 | 2 | 2 | 1  | 2 |

|    |          |     |   |   |   |   |
|----|----------|-----|---|---|---|---|
| 18 | December | 100 | 7 | 7 | 1 | 2 |
|    | March    | 100 | 7 | 7 | 0 | 0 |
|    | May      | 100 | 7 | 7 | 0 | 2 |
|    | October  | 100 | 7 | 7 | 0 | 0 |
| 19 | December | 100 | 3 | 3 | 2 | 3 |
|    | March    | 100 | 3 | 3 | 0 | 0 |
|    | May      | 100 | 3 | 3 | 0 | 0 |
|    | October  | 100 | 3 | 3 | 0 | 0 |
| 20 | December | 100 | 2 | 2 | 0 | 0 |
|    | March    | 100 | 4 | 4 | 0 | 0 |
|    | May      | 100 | 4 | 4 | 0 | 0 |
| 21 | December | 100 | 3 | 3 | 0 | 0 |
|    | March    | 100 | 2 | 2 | 0 | 0 |
|    | May      | 100 | 2 | 2 | 7 | 3 |
|    | October  | 100 | 2 | 2 | 9 | 5 |
| 22 | December | 100 | 5 | 5 | 1 | 0 |
|    | March    | 100 | 2 | 2 | 2 | 0 |
|    | May      | 100 | 2 | 2 | 1 | 0 |
|    | October  | 100 | 2 | 2 | 1 | 1 |
| 23 | December | 100 | 1 | 1 | 0 | 0 |
|    | March    | 100 | 1 | 1 | 1 | 0 |
|    | May      | 100 | 1 | 1 | 1 | 0 |
|    | October  | 100 | 1 | 1 | 0 | 0 |
| 24 | December | 100 | 2 | 2 | 3 | 2 |
|    | March    | 100 | 5 | 5 | 0 | 0 |
|    | May      | 100 | 5 | 5 | 2 | 0 |
| 25 | December | 100 | 2 | 2 | 1 | 0 |
|    | March    | 100 | 3 | 3 | 2 | 5 |
|    | May      | 100 | 3 | 3 | 2 | 2 |
|    | October  | 100 | 3 | 3 | 0 | 0 |

**Table S8:** Result of GLMM-4 of blood fed/ empty *An. gambiae* s.l. female in coastal and inland village with PSC and WT sampling methods as function of usage of LLINs.

| Variables                        | Estimate | Std.Error | z value | Pr(> z ) |
|----------------------------------|----------|-----------|---------|----------|
| <b>Intercept</b>                 | 1.945    | 0.436     | 4.459   | <0.001   |
| <b>Yes LLINs</b>                 | -2.906   | 0.459     | -6.325  | <0.001   |
| <b>Coastal Village</b>           | -1.271   | 0.496     | -2.562  | 0.01     |
| <b>Coastal Village*Yes LLINs</b> | 2.177    | 0.542     | 4.015   | <0.001   |

**Table S9:** Result of GLMM-4 of blood fed/ empty *An. gambiae* s.l. female in coastal and inland village only with PSC samples.

| Variables | Estimate | Std.Error | z value | Pr(> z ) |
|-----------|----------|-----------|---------|----------|
|-----------|----------|-----------|---------|----------|

|                                  |        |       |        |        |
|----------------------------------|--------|-------|--------|--------|
| <b>Intercept</b>                 | 1.945  | 0.436 | 4.459  | <0.001 |
| <b>Yes LLINs</b>                 | -1.646 | 0.480 | -3.426 | <0.001 |
| <b>Coastal Village</b>           | -0.356 | 0.557 | -0.640 | 0.522  |
| <b>Coastal Village*Yes LLINs</b> | 0.842  | 0.665 | 1.263  | 0.206  |
